# Supplementary material for: Optimized porous rutile TiO2 nanorod arrays for enhancing the efficiency of dye-sensitized solar cells
Source: Royal Society of Chemistry journal article supplement (doi:10.1039/c3ee24125d), 2013-01-01
Supplement: c3ee24125d.pdf [file c3ee24125d.pdf]

## Supporting Information

### An Optimized Porous Rutile TiO<sub>2</sub> Nanorod Arrays for Enhancing Efficiency of Dye-Sensitized Solar Cells

Miaoqiang Lv<sup>a</sup>, Yuekun Lai<sup>b</sup>, Dajiang Zheng<sup>a</sup>, Meidan Ye<sup>a</sup>, Jing Xiao<sup>a</sup>, Wenxi Guo<sup>a</sup>, Lan Sun<sup>a</sup>, Changjian Lin<sup>ab\*</sup> and Juan Zuo<sup>c</sup>

<sup>a</sup> State Key Laboratory of Physical Chemistry of Solid Surfaces, and Department of Chemistry, College of Chemistry and Chemical Engineering, Xiamen University, Xiamen, 361005, People's Republic of China. E-mail: [cjlin@xmu.edu.cn](mailto:cjlin@xmu.edu.cn); Fax: +86-592-2186657; Tel: +86-592-2189354

<sup>b</sup> College of Materials, Xiamen University, Xiamen, 361005, People's Republic of China.

<sup>c</sup> Institute of Material Preparation and Applied Technology, Xiamen University of Technology, Xiamen, 361005, People's Republic of China.

\* Corresponding author. E-mail: [cjlin@xmu.edu.cn](mailto:cjlin@xmu.edu.cn)

20

**Figure S1.** FE-SEM images of 1-D rutile TiO<sub>2</sub> NRAs prepared by hydrothermal method in a solution of 3 ml TiCl<sub>4</sub>, 30 ml DI water and 30 ml HCl (36.0~38.0w%) at 150 °C for different time; Film thickness versus the hydrothermal duration at 150 °C in a solution containing 3 ml TiCl<sub>4</sub>, 30 ml DI water and 30 ml HCl (36.0~38.0w%).

25

**Figure S2.** FE-SEM image of 1-D single-crystal rutile TiO<sub>2</sub> NRAs prepared in a solution of 3 ml TiCl<sub>4</sub>, 30 ml DI water and 30 ml HCl (36.0~38.0w%) at 180 °C for 3 h.

**Figure S3.** FE-SEM images of rutile TiO<sub>2</sub> NRA films fabricated by hydrothermal in a solution of 3 ml TiCl<sub>4</sub>, 30 ml DI water and 30 ml HCl (36.0~38.0w%) at 150 °C for 12 h, followed by etching treatment in a solution of 20 ml DI water and 40 ml HCl (36.0~38.0w%) at 150 °C for 3h, 5h and 9h

**Figure S4.** FE-SEM images of etched rutile TiO<sub>2</sub> NRAs prepared by a secondary hydrothermal method with refreshed hydrothermal solutions.

35

**Figure S5.** FE-SEM images of ~ 21μm P25 NP film prepared by doctor-blade method on the TiCl<sub>4</sub>-treated FTO substrate.

**Figure S6.** Photograph of the home-made Teflon-socket used for preparation of rutile TiO<sub>2</sub> NRAs.

40

**Figure S7.** XRD patterns of the FTO substrate, the FTO substrate with a compact TiO<sub>2</sub> layer and the glass substrate with a compact TiO<sub>2</sub> layer.

**Figure S8.** Comparison of SEM images of the rutile TiO<sub>2</sub> NRAs grown on the bare FTO substrate and the FTO substrate with a compact TiO<sub>2</sub> layer.

45

**Figure S9.** Photograph of the rutile TiO<sub>2</sub> NRA film on the FTO substrate fabricated by hydrothermal in a solution of 3 ml TiCl<sub>4</sub>, 30 ml DI water and 30 ml HCl (36.0~38.0w%) at 150 °C for 12 h, followed by different etching treatment.

50

**Figure S10.** UV-vis absorbance spectra of the photoanodes without dye-sensitizing

**Figure S11.** SEM images of the rutile TiO<sub>2</sub> NRAs etched under other conditions

**Figure S12.** SEM images of the rutile TiO<sub>2</sub> NRAs prepared by refreshing the hydrothermal solution for several times.

**Figure S13.** The electrochemical impedance spectra of the DSCs based on the ~ 20 μm rutile TiO<sub>2</sub> NRA photoanodes.

10

**Figure S14.** SEM images of the 1 h-etched rutile TiO<sub>2</sub> NRAs.

**Figure S15.** UV-vis absorbance spectra of the N719 dye-sensitized photoanodes with TiCl<sub>4</sub>-treated FTO substrate as the baseline reference

15

**Figure S16.** IPCE spectra of the assembled DSCs based on rutile TiO<sub>2</sub> NRAs with different etching treatment; DSC-0, DSC-3, DSC-5, DSC-7 and DSC-9 are corresponding to the DSCs based on the rutile TiO<sub>2</sub> NRAs with 0, 3, 5, 7 and 9 h etching duration.

20

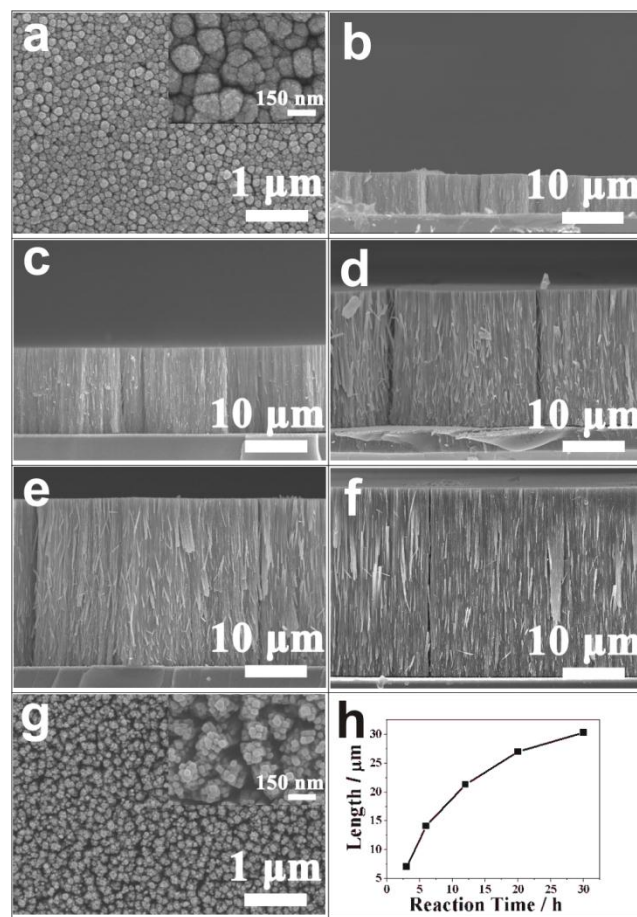

**Figure S1.** FE-SEM images of 1-D rutile  $\text{TiO}_2$  NRAs prepared by hydrothermal method in a solution of 3 ml  $\text{TiCl}_4$ , 30 ml DI water and 30 ml HCl (36.0~38.0w%) at 150 °C for different time. a, b)  $\text{TiO}_2$  NRAs prepared by hydrothermal for 3 h; image (a) and its inset show the top views of the as-prepared film; image (b) shows the cross-sectional view of the film. Images (c), (d), (e) and (f) corresponding to the rutile  $\text{TiO}_2$  NRAs prepared by hydrothermal for 6 h, 12 h, 20 h and 30 h, respectively. Image (g) and its inset shows the top views of the  $\text{TiO}_2$  NRAs prepared by hydrothermal for 30 h. h) Film thickness versus the hydrothermal duration at 150 °C in a solution containing 3 ml  $\text{TiCl}_4$ , 30 ml DI water and 30 ml HCl (36.0~38.0w%).

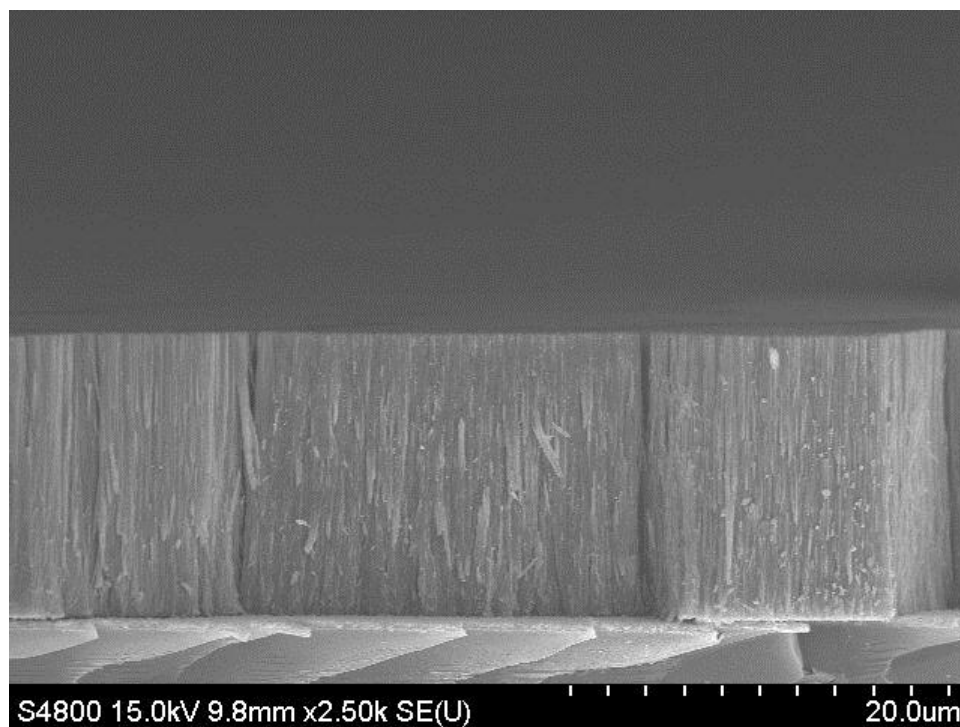

**Figure S2.** FE-SEM image of 1-D single-crystal rutile TiO<sub>2</sub> NRAs prepared in a solution of 3 ml TiCl<sub>4</sub>, 30 ml DI water and 30 ml HCl (36.0~38.0w%) at 180 °C for 3 h. It can be seen from the cross-sectional view of the film that around 15-μm-thick TiO<sub>2</sub> NRAs has been achieved and the film maintains an excellent adhesion with the FTO substrate.

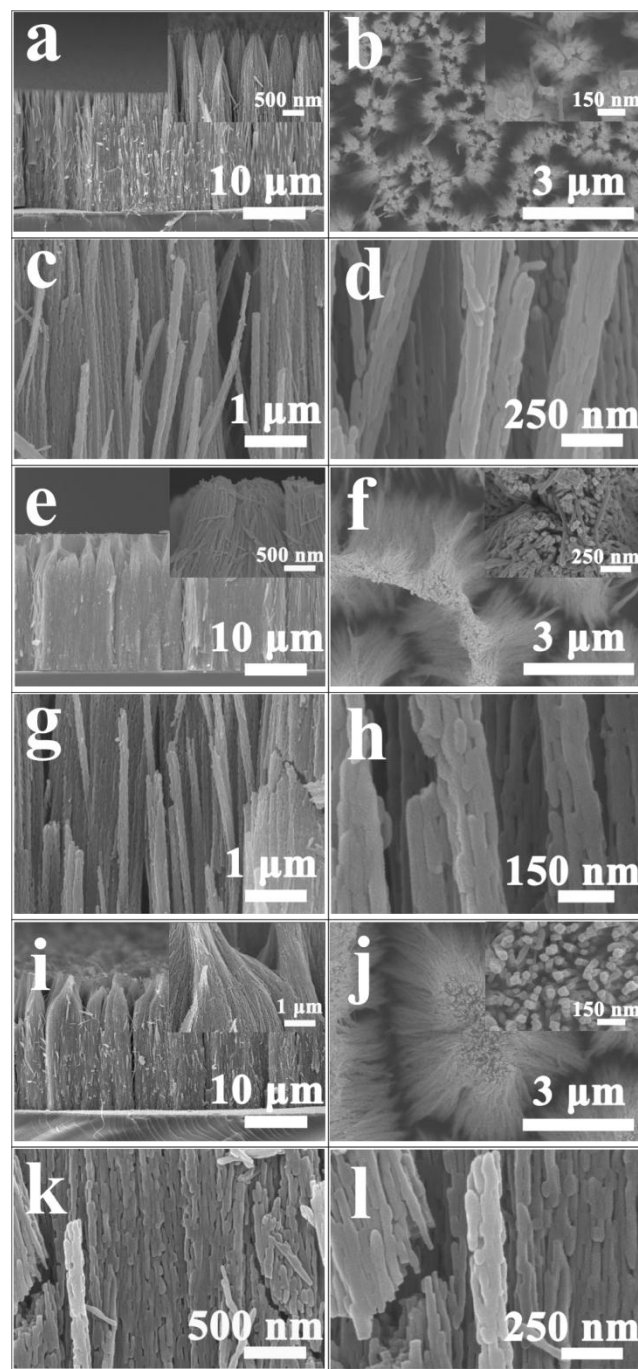

**Figure S3.** FE-SEM images of rutile  $\text{TiO}_2$  NRA films fabricated by hydrothermal in a solution of 3 ml  $\text{TiCl}_4$ , 30 ml DI water and 30 ml HCl (36.0~38.0w%) at 150 °C for 12 h, followed by etching treatment in a solution of 20 ml DI water and 40 ml HCl at 150 °C for different time. (a), (b), (c) and (d) 3-h-etched films; (e), (f), (g) and (h) 5-h-etched films; (i), (j), (k) and (l) 9-h-etched films; (a), (e) and (i) show the cross-sectional views of the films etched for 3, 5 and 9 h, respectively, while (b), (f) and (j) show the top views of the corresponding films. Insets show the enlarged FE-SEM images of the corresponding samples.

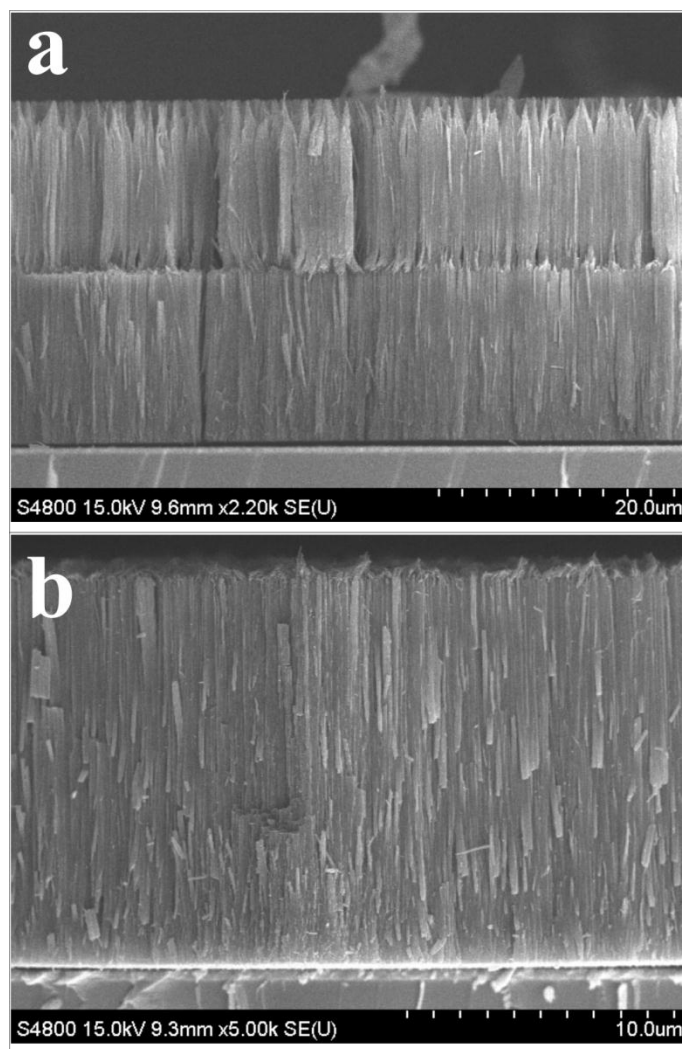

**Figure S4.** FE-SEM images of rutile TiO<sub>2</sub> NRAs grown on the TiCl<sub>4</sub>-treated FTO substrate in a solution of 2 ml TiCl<sub>4</sub>, 30 ml H<sub>2</sub>O and 30 ml HCl (36.0~38.0w%) at 150 °C for 10 h and the hydrothermal process was repeated 5 once by refreshing the hydrothermal solution under the same condition, then followed by a etching treatment process using HCl as the etching agent. After etching treatment, the interface between the two rutile TiO<sub>2</sub> NRA layers can be clearly seen from image (a) and the upper layer was easily detached from the under layer in some part of the film, as shown in image (b).



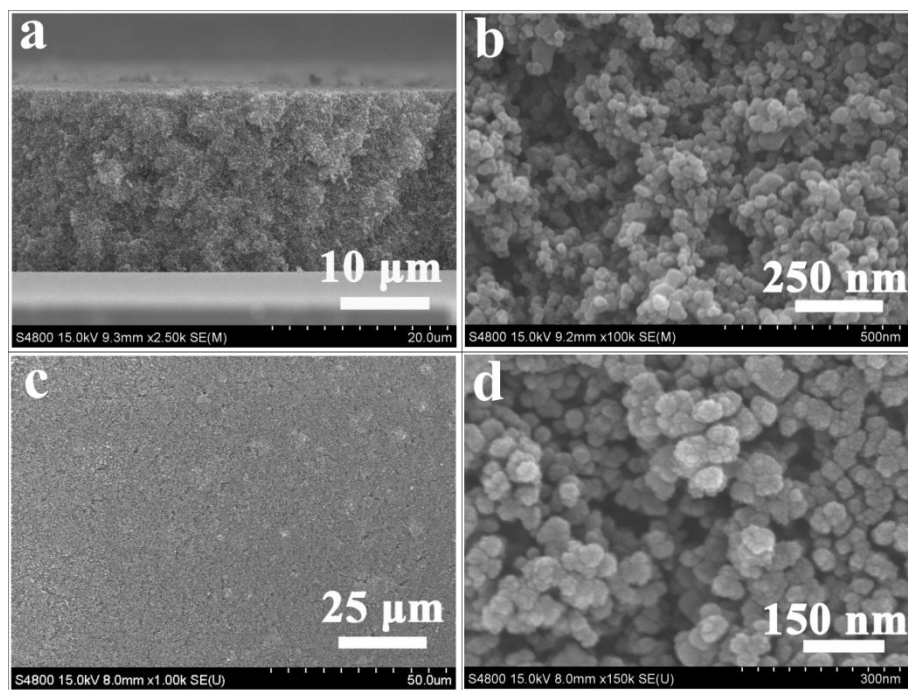

**Figure S5.** FE-SEM images of ~ 21μm P25 NP film prepared by doctor-blade method on TiCl<sub>4</sub>-treated FTO substrate. (a) Cross-sectional image of the as-prepared P25 film. (b) Enlarged view of TiO<sub>2</sub> nanoparticle (NP) 5 from the cross-sectional image. (c) Top view of the P25 film. (d) Magnified image of top morphology, indicating that the diameter of TiO<sub>2</sub> NPs is in the range of 20~50 nm.

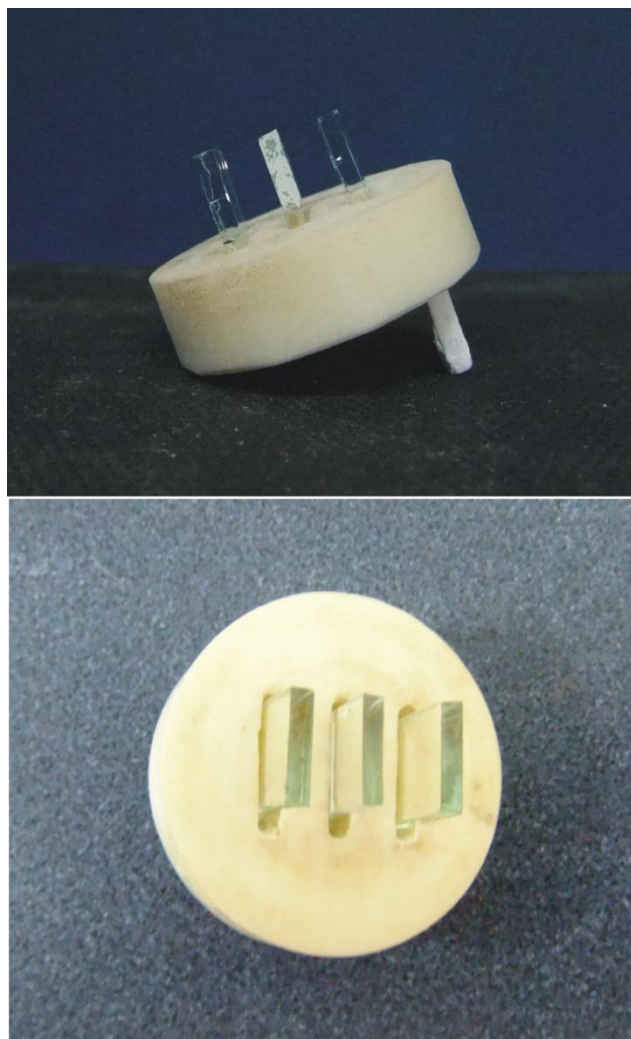

**Figure S6.** Photograph of the home-made Teflon-socket used for preparation of rutile  $\text{TiO}_2$  NRAs. There are mainly three advantages introduced by the socket. First, FTO substrates can be firmly fixed on the socket so that falling down to the bottom of the autoclave can be avoided, while in previous report, the FTO substrate is simply place against the inner wall of the autoclave with its conductive side facing down. Second, the inserted portion of FTO substrate was wrapped with Teflon tape so as to protect the conductive side inserted in the socket from being deposited by rutile  $\text{TiO}_2$  NRAs and preserve its conductivity. Third, three pieces of FTO substrates can be used at each hydrothermal experiment and as it has been confirmed in our experiment, these three samples have almost a similar film thickness and diameter in the same hydrothermal condition regardless of a little height difference.



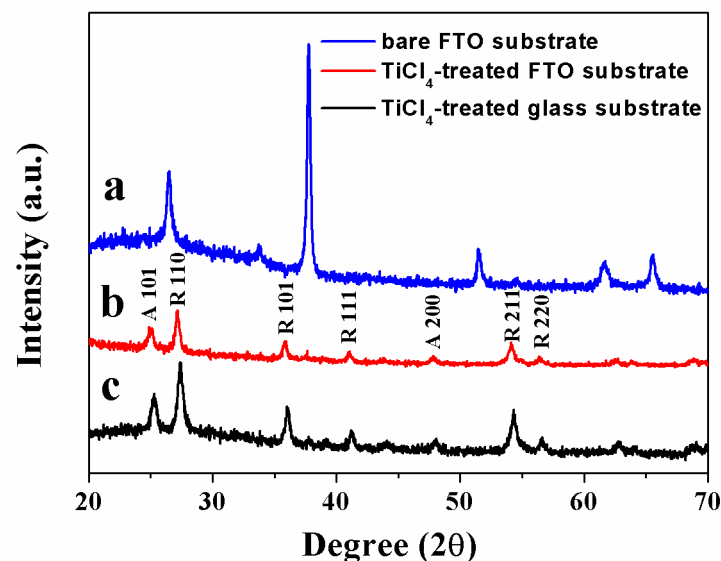

**Figure S7.** XRD patterns of the FTO substrate (a), the FTO substrate with a compact TiO<sub>2</sub> layer (b) and the glass substrate with a compact TiO<sub>2</sub> layer (c). “A” is denoted as anatase TiO<sub>2</sub>, while “R” is denoted as rutile TiO<sub>2</sub>. In order to identify the phase of the compact TiO<sub>2</sub> layer, the FTO substrate and the glass substrate were immersed in an aqueous solution of 0.2 M TiCl<sub>4</sub> and then kept at 70 °C for 12 h. The samples were annealed at 550°C for 1h before the XRD measurements. We found that only the XRD peaks corresponding to the FTO substrate could be observed if the FTO substrate was deposited for only 30 min, because the compact TiO<sub>2</sub> layer that was deposited only for 30 min was too thin to be detected. Therefore, the deposition duration was prolonged to 12 h in this experiment.

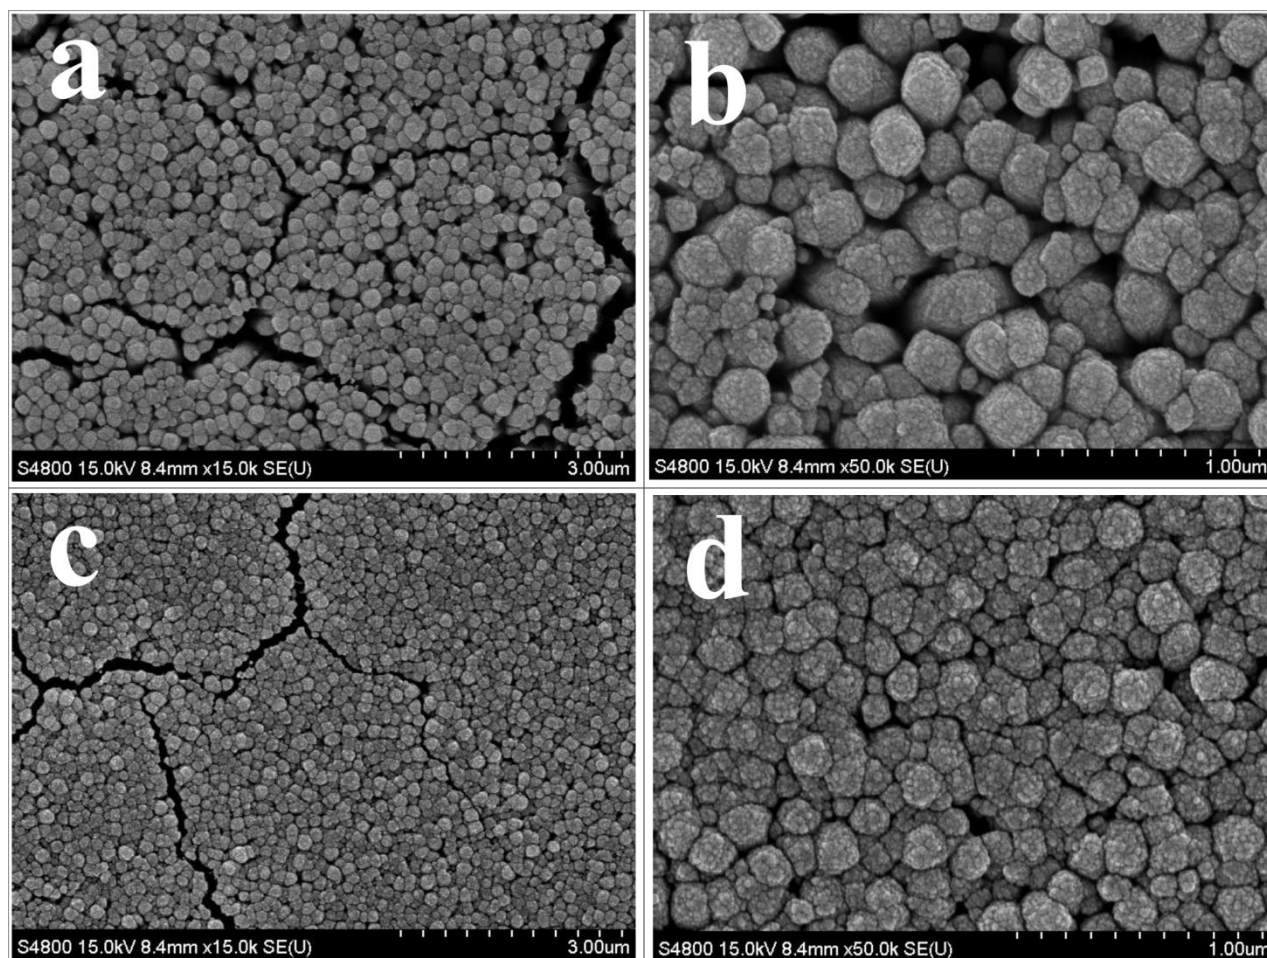

**Figure S8.** SEM images of the rutile  $\text{TiO}_2$  NRAs grown on the (a) (b) bare FTO substrate and (c) (d) FTO substrate with a compact  $\text{TiO}_2$  layer. From the top morphology of the rutile  $\text{TiO}_2$  NRAs, it could be observed that the diameter of the nanorods grown directly on the bare FTO substrate is in the range of 100-230 nm while the diameter of the nanorods grown on the  $\text{TiCl}_4$ -treated FTO substrate (e.g. pre-treated a compact  $\text{TiO}_2$  layer) is around 150 nm. Moreover, the nanorods for the latter sample is much more densely aligned and uniformly distributed in the diameter. The samples were prepared in a hydrothermal solution of 1 ml  $\text{TiCl}_4$ , 30 ml concentrated HCl (36.0~38.0w%) and 30ml DI water and kept for 6 h at 150 °C. As for the FTO substrate with a compact  $\text{TiO}_2$  layer, the preparation process is the same to the description in the Experimental section of the manuscript.

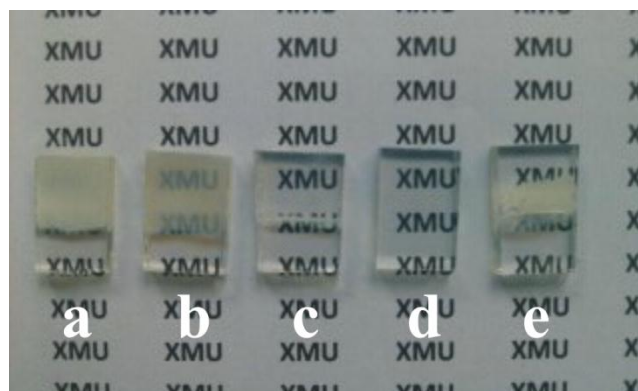

**Figure S9.** Photograph of the rutile  $\text{TiO}_2$  NRA film on the FTO substrate fabricated by hydrothermal in a solution of 3 ml  $\text{TiCl}_4$ , 30 ml DI water and 30 ml HCl (36.0~38.0w%) at 150 °C for 12 h, followed by (a) annealed at 450 °C for 2 h, (b) without any post-treatment, (c) etching treatment in a solution of 10 ml DI water and 50 ml HCl at 150 °C for 7 h, (d) etching treatment in a solution of 60 ml HCl at 150 °C for 7 h and (e) etching treatment in a solution of 20 ml DI water and 40 ml HCl at 150 °C for 9 h.

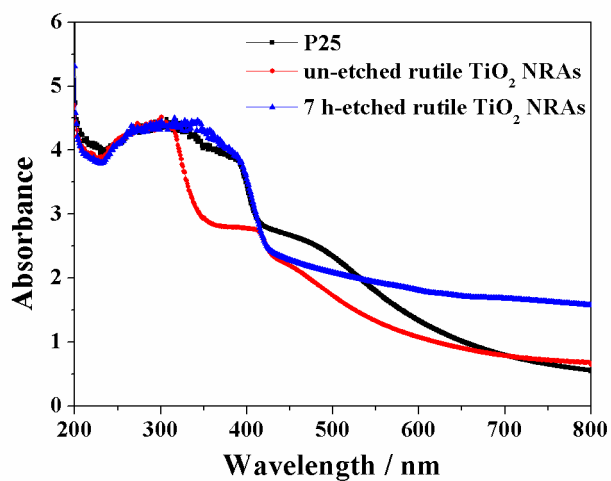

**Figure S10.** UV-vis absorbance spectra of the photoanodes without dye-sensitizing: P25 (the black curve), un-etched rutile TiO<sub>2</sub> NRAs with the thickness around 20  $\mu\text{m}$  (the red curve) and 7 h-etched rutile TiO<sub>2</sub> NRAs 5 with the thickness around 20  $\mu\text{m}$  (the blue curve). All the samples were annealed at 450  $^{\circ}\text{C}$  for 2 hours before the measurements.

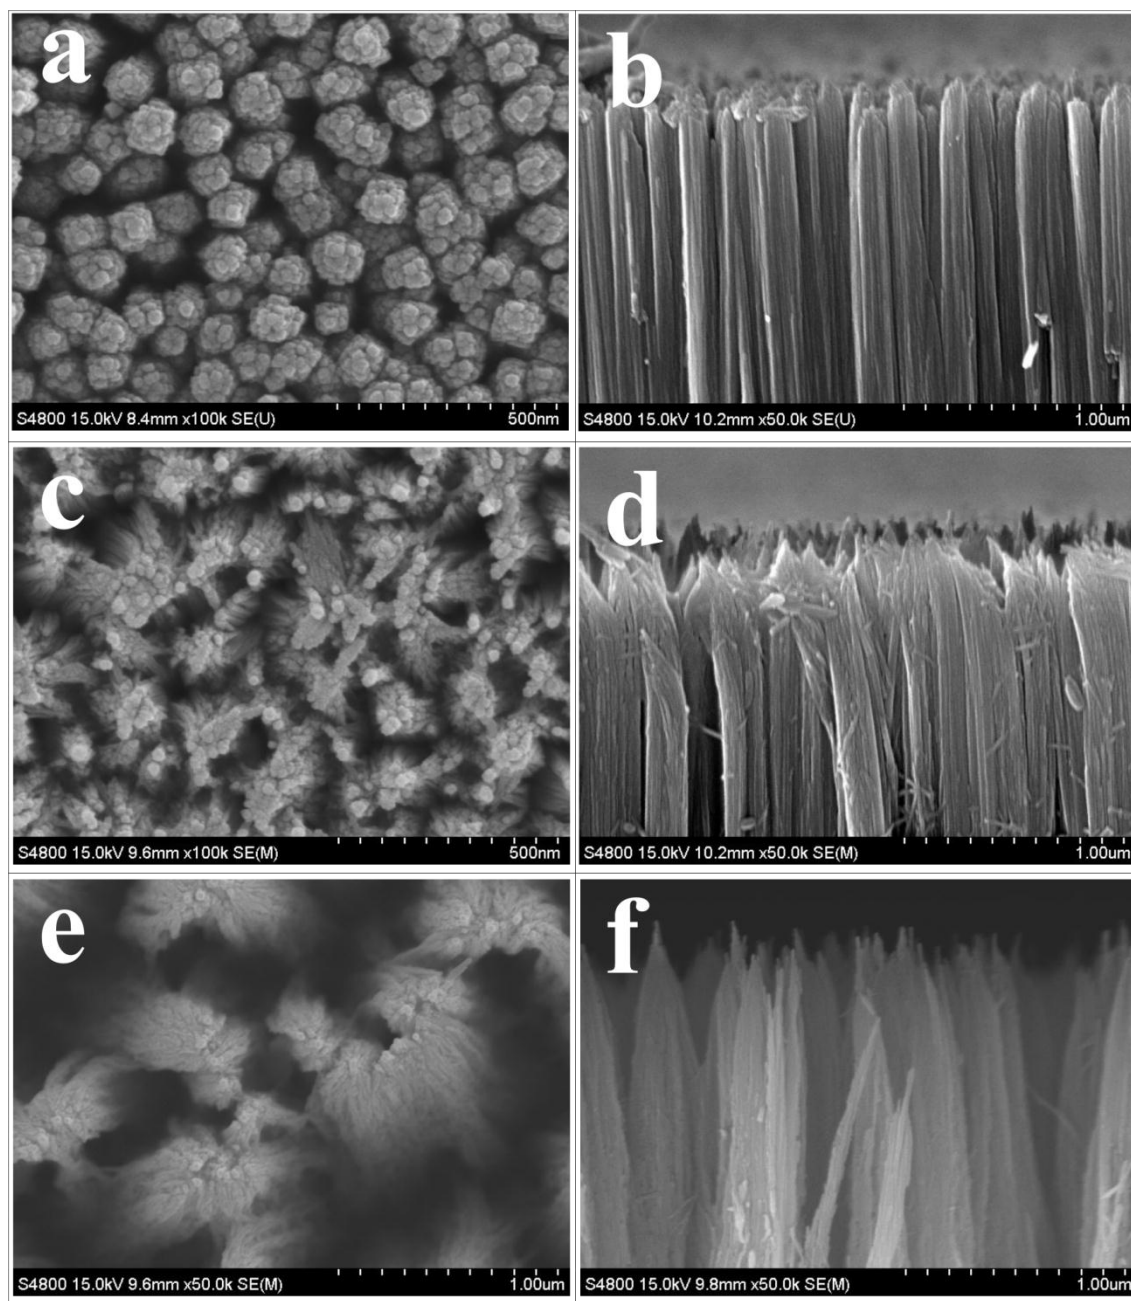

**Figure S11.** SEM images of the rutile  $\text{TiO}_2$  NRAs etched under other conditions: (a) (b) saturated NaCl solution at 150 °C for 7 h; (c) (d) 4 mol/L sulfuric acid aqueous solution at 150 °C for 3 h and (e) (f) 4 mol/L sulfuric acid aqueous solution at 150 °C for 7 h. The rutile  $\text{TiO}_2$  NRAs used for these experiments were prepared on  $\text{TiCl}_4$ -treated FTO substrates by hydrothermal in a solution of 3 ml  $\text{TiCl}_4$ , 30 ml DI water and 30 ml HCl (36.0~38.0w%) at 150 °C for 12 h. The as-prepared samples were non-annealed before the SEM observation.



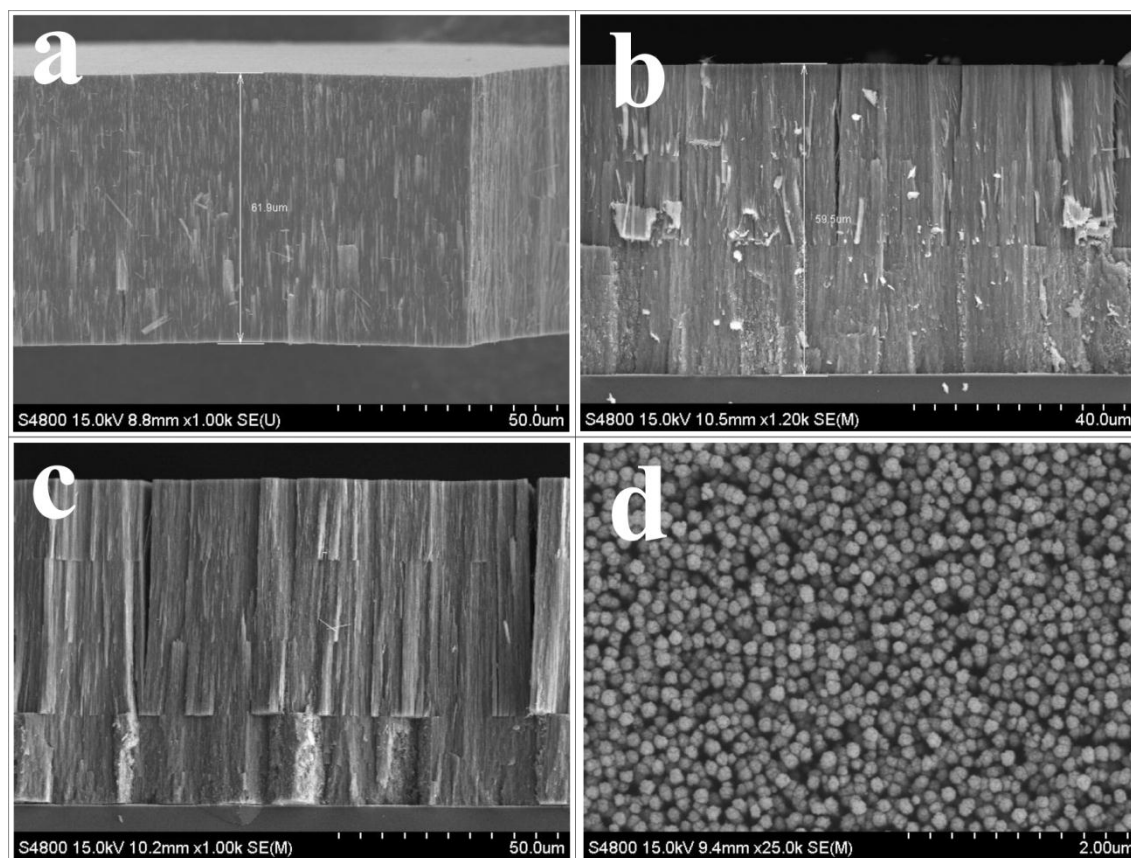

**Figure S12.** SEM images of the rutile TiO<sub>2</sub> NRAs prepared by refreshing the hydrothermal solution for several times. (a) ~62 μm rutile TiO<sub>2</sub> NRAs prepared in a solution of 3 ml TiCl<sub>4</sub>, 30 ml DI water and 30 ml HCl (36.0~38.0w%) at 150 °C for 10 h, followed by refreshing the hydrothermal solution for three times with the same hydrothermal duration for each stage (i.e. 10 h); (b) ~ 59.5 μm rutile TiO<sub>2</sub> NRAs prepared by refreshing the hydrothermal solution for two times. First, ~ 25 μm rutile TiO<sub>2</sub> NRAs was annealed at 450 °C for 2 h. Then the sample was used for further hydrothermal reaction in a solution of 3 ml TiCl<sub>4</sub>, 30 ml DI water and 30 ml HCl (36.0~38.0w%) at 150 °C for 10 h and the hydrothermal reaction was continued for another 10 h after refreshing the hydrothermal solution. (c), (d) ~ 74 μm rutile TiO<sub>2</sub> NRAs prepared by refreshing the hydrothermal solution for three times. First, ~ 20 μm rutile TiO<sub>2</sub> NRAs on the TiCl<sub>4</sub>-treated FTO substrate was annealed at 450 °C for 2 h. Then, the sample was used for further hydrothermal in a solution of 3 ml TiCl<sub>4</sub>, 30 ml DI water and 30 ml HCl (36.0~38.0w%) at 150 °C for 10 h, followed by refreshing the hydrothermal solution for another two times with each stage lasting for 12 h. Image (a), (b) and (c) are the cross-sectional view of the as-prepared films and image (d) is the top-morphology of the ~ 74 μm rutile TiO<sub>2</sub> NRAs.

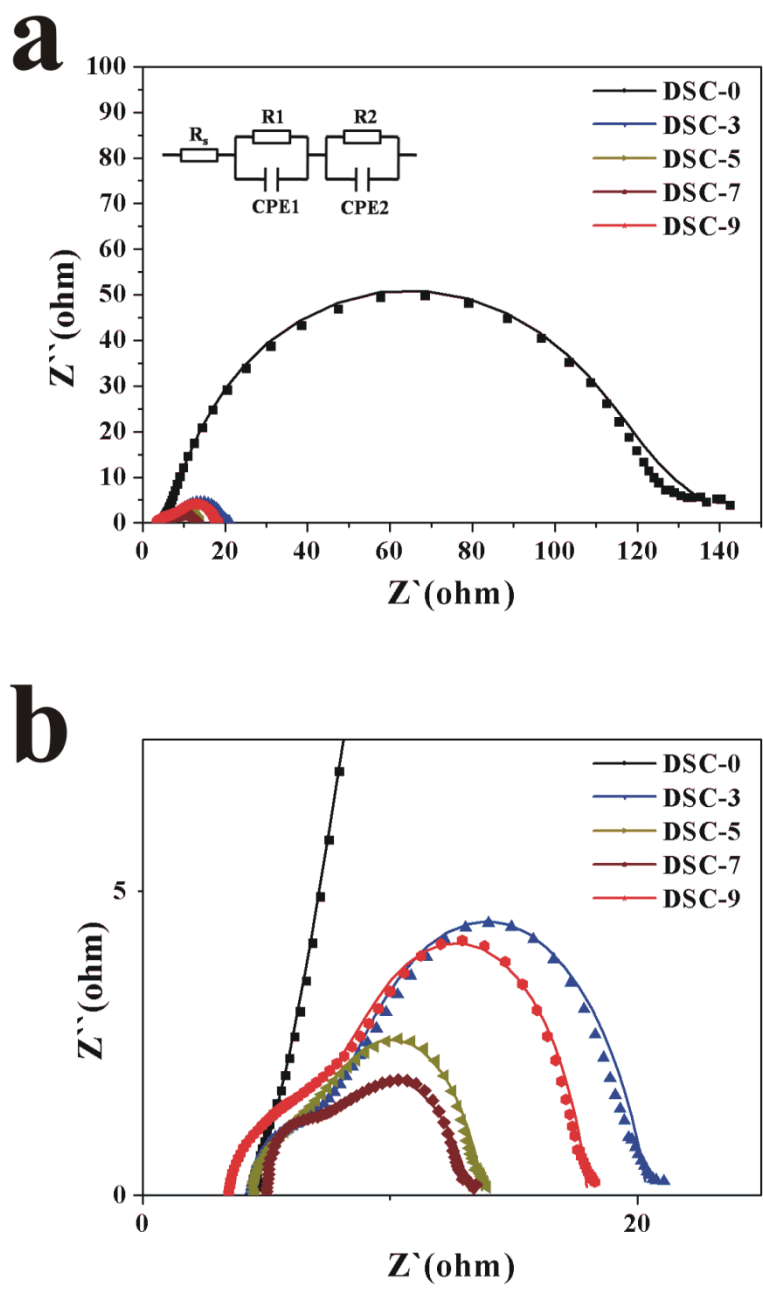

**Figure S13.** (a) The electrochemical impedance spectra of the DSCs based on the  $\sim 20\ \mu\text{m}$  rutile  $\text{TiO}_2$  NRA photoanodes. DSC-0, DSC-3, DSC-5, DSC-7 and DSC-9 are corresponding to the DSCs assembled by the rutile  $\text{TiO}_2$  NRAs with 0 h, 3 h, 5 h, 7 h and 9 h etching treatment, respectively. An active area of  $0.14\ \text{cm}^2$  was used for EIS measurements. The inset image of (a) shows the equivalent circuit used for fitting. The dot lines are measured curves of the DSCs while the continuous solid lines are the corresponding fitted curves calculated by the ZSimpWin software according to the given equivalent circuit. Figure (b) shows the enlarged Nyquist plots of the DSC-3, DSC-5, DSC-7 and DSC-9. The equivalent circuit is composed of two constant phase elements (CPE) and three resistances (R).  $R_s$ ,  $R_1$  and  $R_2$  are corresponding to the sheet resistance of substrate, charge transfer resistance of the counter electrode and recombination resistance, respectively.

Table 1. Resistance values calculated from the fitted EIS spectra using a ZSimpWin software.

| Sample | $R_s$ (ohm) | $R_1$ (ohm) | $R_2$ (ohm) |
|--------|-------------|-------------|-------------|
|--------|-------------|-------------|-------------|

|              |      |       |       |
|--------------|------|-------|-------|
| <b>DSC-0</b> | 4.25 | 43.77 | 94.12 |
| <b>DSC-3</b> | 4.25 | 3.65  | 12.51 |
| <b>DSC-5</b> | 4.42 | 2.55  | 6.8   |
| <b>DSC-7</b> | 4.92 | 2.21  | 6.13  |
| <b>DSC-9</b> | 3.37 | 4.48  | 10.51 |

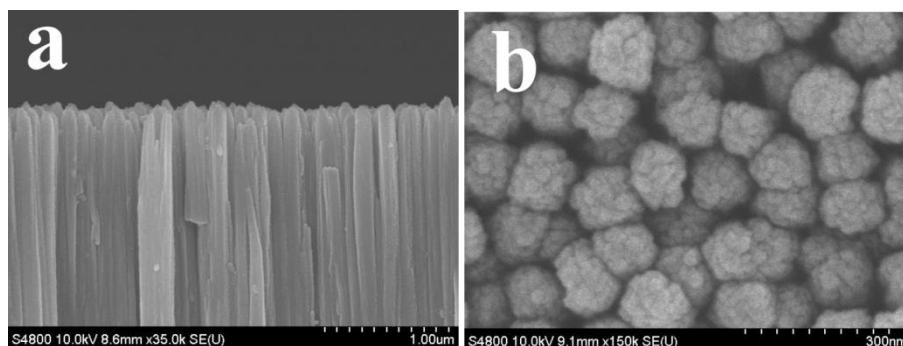

**Figure S14.** SEM images of the enlarged cross-sectional view of 1 h-etched rutile  $\text{TiO}_2$  NRAs (a) and the top morphology (b); The rutile  $\text{TiO}_2$  NRAs used for assembly of the DSC was prepared in a solution of 3 ml  $\text{TiCl}_4$ , 30 ml DI water and 30 ml HCl (36.0~38.0w%) at 150 °C for 12 h, followed by etching treatment in a solution containing 20 ml DI water and 40 ml HCl (36.0~38.0w%) at 150 °C for 1 h. The as-prepared sample was annealed at 450 °C for 2 h before assembled into DSCs.

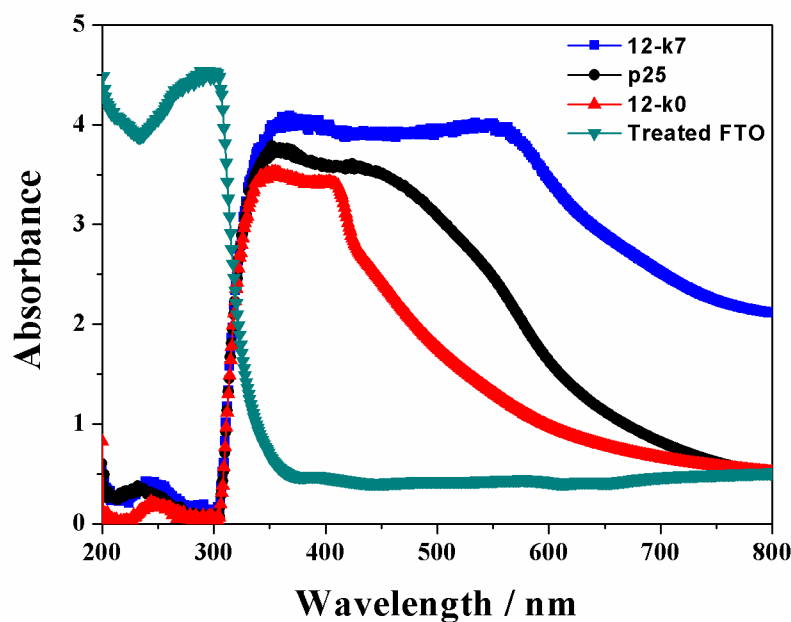

**Figure S15.** UV-vis absorbance spectra of the N719 dye-sensitized photoanodes: P25 (the black curve), un-etched rutile TiO<sub>2</sub> NRAs with the thickness around 20  $\mu\text{m}$  (the red curve) and 7 h-etched rutile TiO<sub>2</sub> NRAs with the thickness around 20  $\mu\text{m}$  (the blue curve). All the samples were annealed at 450  $^{\circ}\text{C}$  for 2 hours before dye-sensitizing. The sample corresponding to the green curve is the TiCl<sub>4</sub>-treated FTO substrate, which is used as the baseline reference and annealed at 450  $^{\circ}\text{C}$  for 2 hours before the measurement. The only difference between the spectra provided here and the Fig 5b in the manuscript is that the baseline used for the latter is blank (ie. the baseline curve was obtained when no sample was fixed in the sample holder of the UV-Vis-NIR spectrophotometer).



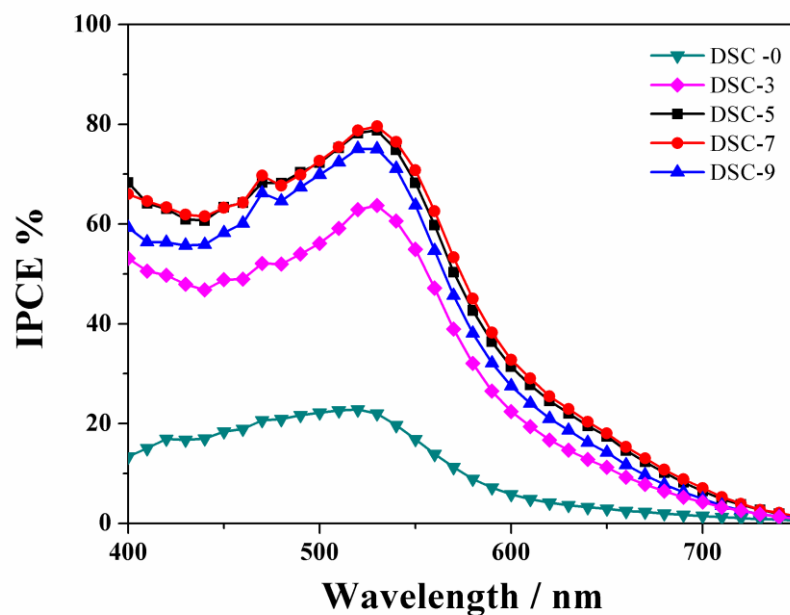

**Figure S16.** Incident photon-to-current efficiency (IPCE) spectra of the assembled DSCs based on rutile  $\text{TiO}_2$  NRAs with different etching treatment; DSC-0, DSC-3, DSC-5, DSC-7 and DSC-9 are corresponding to the DSCs based on the rutile  $\text{TiO}_2$  NRAs with 0, 3, 5, 7 and 9 h etching duration. IPCE spectra were measured on an 5 Oriel QE/IPCE Measurement Kit (Newport) with 150-300W Oriel Solar Simulators.
